# Supplementary material for: Biosynthesis of the antibiotic nonribosomal peptide penicillin in baker's yeast
Source: PubMed Central journal article supplement (PMC5418595; doi:10.1038/ncomms15202), 2017-05-04
Supplement: ncomms15202-s1.pdf [file ncomms15202-s1.pdf]

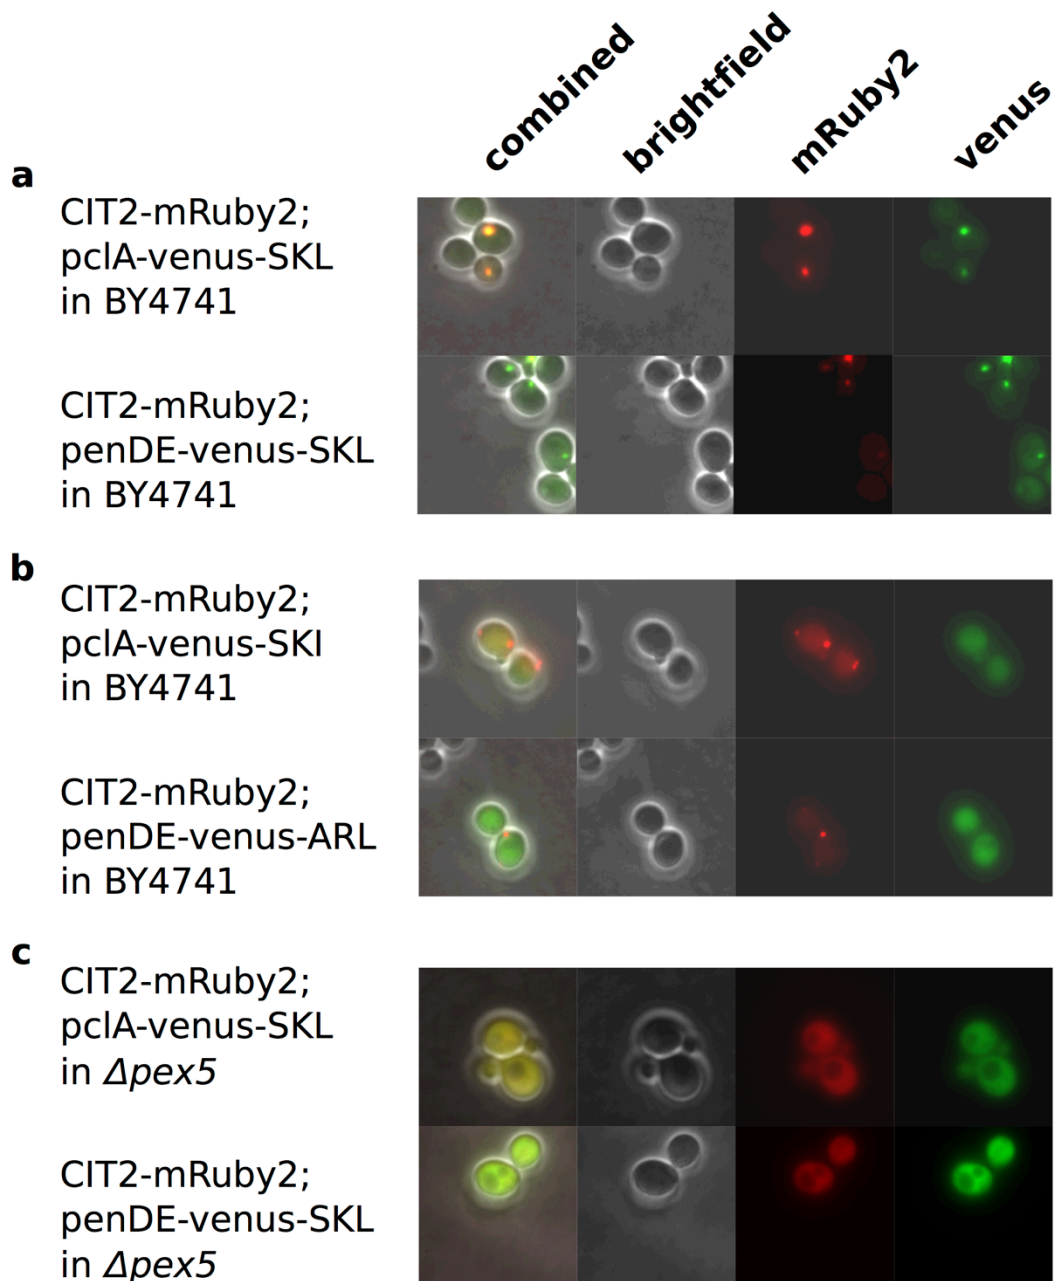

**Supplementary Figure 1. *S. cerevisiae* PTS1 tags are necessary to localise *pclA* and *penDE* to peroxisomes.** (a) *S. cerevisiae* peroxisomal protein CIT2 with an mRuby2 fluorescence tag co-localises with venus-fluorescence-tagged *pclA* and *penDE* proteins additionally tagged with the *S. cerevisiae* Peroxisome Targeting Sequence 1 (PTS1) tripeptide SKL at the C-terminus. For this and subsequent parts, the promoter driving expression of *pclA* and *penDE* with the venus fluorescence tag is the strong constitutive promoter pTDH3. (b) Venus-fluorescence-tagged *pclA* and *penDE* proteins without the *S. cerevisiae* PTS1 but tagged with the native *P. chrysogenum* PTS1 tripeptides SKI and ARL do not co-localise with mRuby2-tagged CIT2. (c) Plasmids from part (a) transformed into an *S. cerevisiae* strain harbouring a delete of the peroxisomal importer *pex5* prevent peroxisomal localisation of CIT2 and the *S. cerevisiae* PTS1-tagged *pclA* and *penDE* proteins.

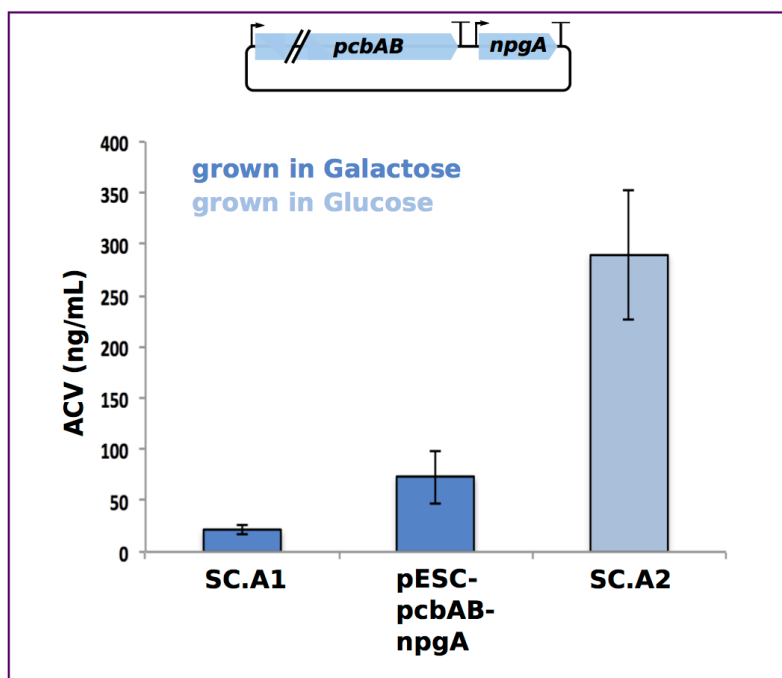

**Supplementary Figure 2. Optimising ACV yields.** Strong, constitutive promoters driving the ACV-producing part of the benzylpenicillin pathway on a low-copy plasmid (Sc.A2) gives higher maximal ACV yields than the same genes under galactose inducible promoters either integrated into a chromosome (Sc.A1) or on a high-copy plasmid (pESC-pcbAB-ntpA). Sc.A2 was grown using glucose as the carbon source, while Sc.A1 and pESC-pcbAB-ntpA were grown using galactose as the carbon source. Error bars represent standard deviation from three biological replicates.

| pcbAB  | ntpA   | GAL 1    | GAL 2    | GAL 3    | mean GAL | GAL s.d. | Glu 1        | Glu 2        | Glu 3        | mean GLU | Glu s.d. |
|--------|--------|----------|----------|----------|----------|----------|--------------|--------------|--------------|----------|----------|
| GAL1   | GAL7   | 502212.0 | 633534.0 | 217523.0 | 451089.7 | 212665.0 | Not detected | Not detected | Not detected | 0.0      | 0.0      |
| GAL1   | TDH3   | 786826.0 | 943928.0 | 391730.0 | 707494.7 | 284518.5 | Not detected | Not detected | Not detected | 0.0      | 0.0      |
| GAL1   | HHF2   | 561543.0 | 649935.0 | 279805.0 | 497094.3 | 193298.4 | Not detected | Not detected | Not detected | 0.0      | 0.0      |
| GAL1   | RPL18B | 545298.0 | 565738.0 | 349162.0 | 486732.7 | 119577.2 | Not detected | Not detected | Not detected | 0.0      | 0.0      |
| RPL18B | GAL1   | 100022.0 | 116057.0 | 51593.0  | 89224.0  | 33561.1  | 56568.0      | 53651.0      | 43446.0      | 51221.7  | 6890.1   |
| RPL18B | PGK1   | 138596.0 | 110451.0 | 58385.0  | 102477.3 | 40695.6  | 197598.0     | 109863.0     | 157372.0     | 154944.3 | 43917.9  |
| RPL18B | CCW12  | 144395.0 | 116449.0 | 59786.0  | 106876.7 | 43109.1  | 211374.0     | 150211.0     | 87174.0      | 149586.3 | 62102.4  |
| RPL18B | ALD6   | 146092.0 | 68694.0  | 56735.0  | 90507.0  | 48508.0  | 131432.0     | 100424.0     | 107881.0     | 113245.7 | 16185.1  |
| TDH3   | PGK1   | 193113.0 | 86218.0  | 103581.0 | 127637.3 | 57364.3  | 404773.0     | 277704.0     | 284469.0     | 322315.3 | 71490.5  |
| TDH3   | CCW12  | 178619.0 | 138064.0 | 73651.0  | 130111.3 | 52934.0  | 361186.0     | 331388.0     | 218401.0     | 303658.3 | 75323.2  |
| TDH3   | ALD6   | 168824.0 | 74255.0  | 60426.0  | 101168.3 | 58998.1  | 369769.0     | 201340.0     | 218023.0     | 263044.0 | 92802.2  |
| HHF2   | PGK1   | 87157.0  | 40076.0  | 36120.0  | 54451.0  | 28393.2  | 56687.0      | 40722.0      | 28941.0      | 42116.7  | 13925.5  |
| HHF2   | CCW12  | 76374.0  | 72364.0  | 46495.0  | 65077.7  | 16217.5  | 34133.0      | 42551.0      | 21065.0      | 32583.0  | 10826.5  |
| HHF2   | ALD6   | 84088.0  | 32408.0  | 24310.0  | 46935.3  | 32428.9  | 65046.0      | 31137.0      | 45320.0      | 47167.7  | 17029.8  |

| ACV Yields      |       |      |       |           |           |           |                    |            |
|-----------------|-------|------|-------|-----------|-----------|-----------|--------------------|------------|
| Strain          | pcbAB | ntpA | sugar | reading 1 | reading 2 | reading 3 | mean conc. (ng/uL) | conc. s.d. |
| Sc.A1           | GAL10 | GAL1 | gal   | 26.868    | 20.011    | 17.482    | 21.454             | 4.857      |
| pESC-ntpA-pcbAB | GAL10 | GAL1 | gal   | 102.938   | 53.643    | 63.204    | 73.262             | 26.142     |
| Sc.A2           | TDH3  | PGK1 | glu   | 362.586   | 249.952   | 255.949   | 289.495            | 63.369     |

**Supplementary Table 1. LCMS peak areas and yields for ACV for the pcbAB, ntpA promoter screen**

| Name (X = sample from screened strain) | Area   | Name (X = sample from screened strain) | Area | Name (X = sample from screened strain) | Area |
|----------------------------------------|--------|----------------------------------------|------|----------------------------------------|------|
| Water                                  |        | X49                                    |      | X105                                   |      |
| Water                                  |        | X50                                    |      | X106                                   |      |
| benzylpenicillin; 10 pg/uL             |        | X51                                    |      | X107                                   |      |
| benzylpenicillin; 100 pg/uL            | 2233   | X52                                    |      | X108                                   |      |
| benzylpenicillin; 1 ng/uL              | 18103  | X53                                    |      | X109                                   |      |
| benzylpenicillin; 10 ng/uL             | 165306 | X54                                    |      | X110                                   |      |
| Water                                  | 981629 | X55                                    |      | X111                                   |      |
| Water                                  |        | X56                                    |      | X112                                   |      |
| X1                                     |        | X57                                    | 1506 | X113                                   |      |
| X2                                     |        | X58                                    |      | X114                                   |      |
| X3                                     |        | X59                                    |      | X115                                   |      |
| X4                                     |        | X60                                    |      | X116                                   |      |
| X5                                     |        | X61                                    |      | X117                                   |      |
| X6                                     |        | X62                                    |      | X118                                   | 586  |
| X7                                     |        | X63                                    |      | X119                                   |      |
| X8                                     |        | X64                                    |      | X120                                   |      |
| X9                                     |        | X65                                    |      | X121                                   |      |
| X10                                    |        | X66                                    |      | X122                                   |      |
| X11                                    |        | X67                                    |      | X123                                   |      |
| X12                                    | 318    | X68                                    |      | X124                                   |      |
| X13                                    |        | X69                                    |      | X125                                   |      |
| X14                                    |        | X70                                    |      | X126                                   |      |
| X15                                    |        | X71                                    | 385  | X127                                   |      |
| X16                                    |        | X72                                    |      | X128                                   |      |
| X17                                    |        | X73                                    | 1285 | X129                                   |      |
| X18                                    |        | X74                                    |      | X130                                   |      |
| X19                                    | 2761   | X75                                    |      | X131                                   |      |
| X20                                    |        | X76                                    | 295  | X132                                   |      |
| X21                                    | 2709   | X77                                    |      | X133                                   |      |
| X22                                    | 1062   | X78                                    |      | X134                                   |      |
| X23                                    |        | X79                                    |      | X135                                   |      |
| X24                                    |        | X80                                    | 411  | X136                                   |      |
| X25                                    |        | X81                                    |      | X137                                   |      |
| X26                                    |        | X82                                    |      | X138                                   | 171  |
| X27                                    | 1292   | X83                                    |      | X139                                   |      |
| X28                                    |        | X84                                    | 665  | X140                                   |      |
| X29                                    |        | X85                                    |      | X141                                   |      |
| X30                                    |        | X86                                    |      | X142                                   |      |
| X31                                    |        | X87                                    |      | X143                                   |      |
| X32                                    |        | X88                                    |      | X144                                   |      |
| X33                                    |        | X89                                    |      | X145                                   |      |
| X34                                    |        | X90                                    | 467  | X146                                   | 692  |
| X35                                    |        | X91                                    |      | X147                                   |      |
| X36                                    |        | X92                                    |      | X148                                   | 1648 |
| X37                                    | 527    | X93                                    |      | X149                                   |      |
| X38                                    |        | X94                                    |      | X150                                   | 1060 |
| X39                                    |        | X95                                    |      | X151                                   |      |
| X40                                    |        | X96                                    |      | X152                                   |      |
| X41                                    |        | X97                                    |      | X153                                   |      |
| X42                                    |        | X98                                    | 2193 | X154                                   |      |
| X43                                    | 359    | X99                                    |      | X155                                   |      |
| X44                                    |        | X100                                   |      | X156                                   |      |
| X45                                    |        | X101                                   |      | X157                                   |      |
| X46                                    |        | X102                                   |      | X158                                   |      |
| X47                                    |        | X103                                   |      | X159                                   |      |
| X48                                    |        | X104                                   |      | X160                                   |      |

**Supplementary Table 2. LCMS peak areas and yields for ACV for the pcbAB, npgA promoter screen**

**Summed nanopore read count data for single assemblies**

|         | pcbC | pclA | penDE |
|---------|------|------|-------|
| pGAL1   | 58   | 79   | 25    |
| pGAL7   | 216  | 139  | 33    |
| pTDH3   | 40   | 107  | 33    |
| pCCW12  | 39   | 59   | 42    |
| pPGK1   | 209  | 89   | 32    |
| pHHF2   | 317  | 91   | 52    |
| pRPL18B | 105  | 71   | 39    |
| pALD6   | 190  | 125  | 42    |
| pPSP2   | 103  | 44   | 73    |
| pREV1   | 78   | 67   | 26    |
| TOTAL   | 1355 | 871  | 397   |

**Summed nanopore read count data for multigene level assembly**

|         | pcbC | pclA | penDE |
|---------|------|------|-------|
| pGAL1   | 16   | 15   | 12    |
| pGAL7   | 19   | 24   | 7     |
| pTDH3   | 12   | 10   | 10    |
| pCCW12  | 17   | 11   | 13    |
| pPGK1   | 7    | 28   | 13    |
| pHHF2   | 17   | 27   | 25    |
| pRPL18B | 21   | 4    | 12    |
| pALD6   | 3    | 3    | 14    |
| pPSP2   | 13   | 5    | 26    |
| pREV1   | 10   | 8    | 3     |
| TOTAL   | 135  | 135  | 135   |

**Summed Sanger read count data from all 10 benzylpenicillin producers**

|         | pcbC | pclA | penDE |
|---------|------|------|-------|
| pGAL1   | 0    | 0    | 0     |
| pGAL7   | 1    | 0    | 0     |
| pTDH3   | 0    | 2    | 2     |
| pCCW12  | 1    | 5    | 0     |
| pPGK1   | 0    | 3    | 2     |
| pHHF2   | 2    | 0    | 2     |
| pRPL18B | 5    | 0    | 1     |
| pALD6   | 0    | 0    | 0     |
| pPSP2   | 1    | 0    | 3     |
| pREV1   | 0    | 0    | 0     |
| TOTAL   | 10   | 10   | 10    |

**one-sided Fisher's exact test for enrichment of pclA strong promoters in multigene assemblies vs. benzylpenicillin producers**

|           | strong | non-strong |
|-----------|--------|------------|
| multigene | 44     | 938        |
| producers | 10     | 0          |

$p < 0.005$  (Fisher's exact test)

**Observed nanopore read count data by promoter category for single assemblies**

|           | pcbC | pclA | penDE |
|-----------|------|------|-------|
| Strong    | 605  | 346  | 159   |
| Medium    | 295  | 196  | 81    |
| Weak      | 181  | 111  | 99    |
| Inducible | 274  | 218  | 58    |

**Expected nanopore read counts for single assemblies for Chi square test based on promoter proportions used in library construction**

|           | pcbC | pclA | penDE |
|-----------|------|------|-------|
| Strong    | 542  | 348  | 159   |
| Medium    | 271  | 174  | 79    |
| Weak      | 271  | 174  | 79    |
| Inducible | 271  | 174  | 79    |

**Observed nanopore read count data by promoter category for multigene assemblies**

|           | pcbC | pclA | penDE |
|-----------|------|------|-------|
| Strong    | 53   | 76   | 61    |
| Medium    | 24   | 7    | 26    |
| Weak      | 23   | 13   | 29    |
| Inducible | 35   | 39   | 19    |

**Expected nanopore read count data by promoter category for multigene assemblies based on single assembly observed distributions**

|           | pcbC | pclA | penDE |
|-----------|------|------|-------|
| Strong    | 60   | 54   | 54    |
| Medium    | 29   | 30   | 28    |
| Weak      | 18   | 17   | 34    |
| Inducible | 27   | 34   | 20    |

**Observed nanopore read count data by promoter category for producers**

|           | pcbC | pclA | penDE |
|-----------|------|------|-------|
| Strong    | 3    | 10   | 6     |
| Medium    | 5    | 0    | 1     |
| Weak      | 1    | 0    | 3     |
| Inducible | 1    | 0    | 0     |

**p-values for Pearson's Chi-squared tests comparing single to multigene level assembly, and Fisher's exact test comparing multigene level assembly to producer for promoter category distributions**

|                         | pcbC       | pclA        | penDE      |
|-------------------------|------------|-------------|------------|
| uniform dist vs. single | $p < 0.27$ | $p < 0.27$  | $p < 0.27$ |
| single vs. multigene    | $p < 0.22$ | $p < 0.22$  | $p < 0.22$ |
| multigene vs. producers | $p < 0.15$ | $p < 0.005$ | $p < 0.52$ |

**Supplementary Table 3. Read counts and statistics for nanopore and Sanger sequencing**

| Experiment | Strain name(s)  | Background Strain    | plasmid(s)          |
|------------|-----------------|----------------------|---------------------|
| Fig 1c, 2a | Sc.A1           | BY4741               | -                   |
| Fig 1c, d  | Sc.P1           | Sc.A1                | pAA056              |
| Fig 1c     | Sc.P1x          |                      |                     |
| Fig 2b, 3  | Sc.P2           | Sc.A2                | pAA179              |
| Fig 3      | Sc.P2x          | BY4741               | pAA180, pAA171      |
| Fig 3      | Sc.S1 - Sc.S12  | BY4741               | variants of pAA179* |
| Fig S1     | -               | BY4741               | pAA210              |
| Fig S1     | -               | BY4741               | pAA211              |
| Fig S1     | -               | BY4741               | pAA212              |
| Fig S1     | -               | BY4741               | pAA213              |
| Fig S1     | -               | BY4741 $\Delta$ pex5 | pAA210              |
| Fig S1     | -               | BY4741 $\Delta$ pex5 | pAA211              |
| Fig S2     | pESC-npgA-pcbAB | BY4741               | pESC-npgA-pcbAB     |
| Fig S2     | Sc.A2           | BY4741               | pAA145              |

#### Primers used to create $\Delta$ pex5 strain

| Purpose                             | Orientation | Sequence                                                    |
|-------------------------------------|-------------|-------------------------------------------------------------|
| to amplify and retarget gRNA vector | F           | CGTTTCTATTTTGAATACTAaaagtccttcgaccaccg                      |
| to amplify and retarget gRNA vector | R           | /5Phos/gtttagagctagaatagcaagttaaataaggctag                  |
| Overlap extension PCR 1             | F           | GTGAAGGAAATCGCAGCTCC                                        |
| Overlap extension PCR 1             | R           | AATGCTAATGAATTTGGGCAGTGATCGGAGCTCCGCCGGAAGGGTACCGACTGTCCG   |
| Overlap extension PCR 2             | F           | CCGACAAGTCGGTACCCTCTCCGGCGGAGCTCGCATCACTGCCCAAATTCATTAGCATT |
| Overlap extension PCR 2             | R           | CCTCTCTGATTTCGTGAGAGATAC                                    |

### Supplementary Table 4. Strains and plasmids used in this paper

\* same as pAA179, but with promoters driving pcbC, pclA and penDE as specified by Table S12

| Experiment        | Molecule of interest | Sugar                 | Dropouts          | Supplements              | Volume      |
|-------------------|----------------------|-----------------------|-------------------|--------------------------|-------------|
| Fig 1c, d         | ACV                  | galactose             | uracil            | 5 mM AAA                 | 30 mL       |
| Fig 1c, d         | benzylpenicillin     | glucose               | uracil, histidine | 5 mM AAA,<br>0.25 mM PAA | 30 mL       |
| Fig S2            | ACV                  | galactose/<br>glucose | uracil            | 5 mM AAA                 | 600 $\mu$ L |
| Fig 2b, 3, S3, S4 | benzylpenicillin     | glucose               | uracil, histidine | 5 mM AAA,<br>0.25 mM PAA | 600 $\mu$ L |

AAA = alpha-amino adipic acid (VWR L13924.0)

PAA = phenylacetic acid (Sigma P16621)

### Supplementary Table 5. ACV and benzylpenicillin production media composition

#### The LC gradient elution method for the separation of compounds in the penicillin-G pathway

| Time (minutes) | % Solvent A | % Solvent B | Flow rate (mL/min) |
|----------------|-------------|-------------|--------------------|
| 0              | 98          | 2           | 0.2                |
| 2              | 98          | 2           | 0.2                |
| 8              | 35          | 65          | 0.2                |
| 8.01           | 5           | 95          | 0.2                |
| 9              | 5           | 95          | 0.2                |

#### The MS/MS fragment ions used for the measurement of benzylpenicillin and other materials in the pathway

| Analyte          | Formula     | Precursor ion [M+H] <sup>+</sup> | Product ion | Collision energy (eV) |
|------------------|-------------|----------------------------------|-------------|-----------------------|
| benzylpenicillin | C16H18N2O4S | 335.106                          | 176.0707    | 16                    |
| LLD-ACV          | C14H25N3O6S | 364.1537                         | 144.0655    | 16                    |

### Supplementary Table 6. LCMS specifications

| Promoter | Category  | Relative Expression* |
|----------|-----------|----------------------|
| pTDH3    | Strong    | 820                  |
| pCCW12   | Strong    | 575                  |
| pPGK1    | Strong    | 291                  |
| pHHF2    | Strong    | 230                  |
| pRPL18B  | Medium    | 60                   |
| pALD6    | Medium    | 39                   |
| pPSP2    | Weak      | 2.2                  |
| pREV1    | Weak      | 1.7                  |
| pGAL1    | Inducible | 1.3                  |
| pGAL7    | Inducible | **                   |

**Supplementary Table 7. Promoters used in first promoter screen to optimise conversion of ACV to benzylpenicillin.**

\* Based on fold-change expression over background of fluorescent reporter Venus protein under each promoter, cells grown in glucose.

Taken from Lee, M.E., DeLoache, W.C., Cervantes, B. & Dueber, J.E. ACS Synth Biol 4, 975-986 (2015).

\*\* Uncharacterised in the above study, but should be similar to value from pGAL1, as these promoters naturally drive similar levels of expression when uninduced.

| Sample | pcbC    | pclA   | penDE  | LCMS | pclA promoter Strength | penDE promoter Strength | Geometric mean of promoter strength<br>pclA + penDE | [benzylpenicillin]<br>ng/mL |
|--------|---------|--------|--------|------|------------------------|-------------------------|-----------------------------------------------------|-----------------------------|
| X19    | pRPL18B | pTDH3  | pCCW12 | 2761 | 820                    | 575                     | 686.659                                             | 3.204                       |
| X148   | pRPL18B | pTDH3  | pPGK1  | 1648 | 820                    | 291                     | 488.487                                             | 1.845                       |
| X98    | pRPL18B | pCCW12 | pPGK1  | 2193 | 575                    | 291                     | 409.054                                             | 2.505                       |
| X80    | pRPL18B | pTDH3  | pGAL1  | 411  | 820                    | 1.3                     | 32.650                                              | 0.418                       |
| X84    | pRPL18B | pPGK1  | pPGK1  | 665  | 291                    | 291                     | 291.000                                             | 0.699                       |
| X37    | pRPL18B | pPGK1  | pHHF2  | 527  | 291                    | 230                     | 258.708                                             | 0.545                       |
| X90    | pRPL18B | pALD6  | pHHF2  | 467  | 39                     | 230                     | 94.710                                              | 0.479                       |

**Supplementary Table 8. Relationship between promoter strength and benzylpenicillin yield in first promoter screen**

Carbon source for these experiments is glucose, with promoter strengths that are indicated those for growth in glucose. Blue = strains featured in Figure 2. Red = strains with low penicillin production, not featured in Figure 2.

**Single Gene Assemblies**

| Reaction | Type 2       | Type 3 | Type 4 | Pre-assembled Type 1;Type 5;Type 8 |
|----------|--------------|--------|--------|------------------------------------|
| Single 1 | promoter mix | pcbC   | tPGK1  | ConLS;ConR1;AmpR-ColE1             |
| Single 2 | promoter mix | pclA   | tENO2  | ConL1;ConR2;AmpR-ColE1             |
| Single 3 | promoter mix | penDE  | tTDH1  | ConL2;ConRE;AmpR-ColE1             |

**Multigene Assembly**

| Gene 1   | Gene 2   | Gene 3   | Pre-assembled Type 6;Type7;Type 8 |
|----------|----------|----------|-----------------------------------|
| Single 1 | Single 2 | Single 3 | His3;2micron;KanR-ColE1           |

**Supplementary Table 9. Golden Gate Assembly reaction parts for promoter screen to optimise conversion of ACV to benzylpenicillin and for nanopore sequencing**

| Promoter | Category | Relative Expression* |
|----------|----------|----------------------|
| pTDH3    | Strong   | 820                  |
| pCCW12   | Strong   | 575                  |
| pPGK1    | Strong   | 291                  |
| pTEF1    | Strong   | 230                  |
| pHHF1    | Medium   | 81                   |
| pRPL18B  | Medium   | 60                   |

**Supplementary Table 10. Promoters used in second promoter screen to optimise conversion of ACV to benzylpenicillin**

\* Based on fold-change expression over background of fluorescent reporter Venus protein under each promoter, cells grown in glucose.

Taken from Lee, M.E., DeLoache, W.C., Cervantes, B. & Dueber, J.E.

ACS Synth Biol 4, 975-986 (2015).

**Single Gene Assemblies**

| Reaction  | Type 2  | Type 3 | Type 4 | Pre-assembled Type 1;Type 5;Type 8 |
|-----------|---------|--------|--------|------------------------------------|
| Single 1  | pTDH3   | pcbC   | tPGK1  | ConLS;ConR1;AmpR-ColE1             |
| Single 2  | pCCW12  | pcbC   | tPGK1  | ConLS;ConR1;AmpR-ColE1             |
| Single 3  | pPGK1   | pcbC   | tPGK1  | ConLS;ConR1;AmpR-ColE1             |
| Single 4  | pTEF1   | pcbC   | tPGK1  | ConLS;ConR1;AmpR-ColE1             |
| Single 5  | pHHF1   | pcbC   | tPGK1  | ConLS;ConR1;AmpR-ColE1             |
| Single 6  | pRPL18B | pcbC   | tPGK1  | ConLS;ConR1;AmpR-ColE1             |
| Single 7  | pTDH3   | pclA   | tENO2  | ConL1;ConR2;AmpR-ColE1             |
| Single 8  | pCCW12  | pclA   | tENO2  | ConL1;ConR2;AmpR-ColE1             |
| Single 9  | pPGK1   | pclA   | tENO2  | ConL1;ConR2;AmpR-ColE1             |
| Single 10 | pTEF1   | pclA   | tENO2  | ConL1;ConR2;AmpR-ColE1             |
| Single 11 | pHHF1   | pclA   | tENO2  | ConL1;ConR2;AmpR-ColE1             |
| Single 12 | pRPL18B | pclA   | tENO2  | ConL1;ConR2;AmpR-ColE1             |
| Single 13 | pTDH3   | penDE  | tTDH1  | ConL2;ConRE;AmpR-ColE1             |
| Single 14 | pCCW12  | penDE  | tTDH1  | ConL2;ConRE;AmpR-ColE1             |
| Single 15 | pPGK1   | penDE  | tTDH1  | ConL2;ConRE;AmpR-ColE1             |
| Single 16 | pTEF1   | penDE  | tTDH1  | ConL2;ConRE;AmpR-ColE1             |
| Single 17 | pHHF1   | penDE  | tTDH1  | ConL2;ConRE;AmpR-ColE1             |
| Single 18 | pRPL18B | penDE  | tTDH1  | ConL2;ConRE;AmpR-ColE1             |

**Multigene Assembly**

| Gene 1                 | Gene 2                  | Gene 3                   | Pre-assembled Type 6;Type7;Type 8 |
|------------------------|-------------------------|--------------------------|-----------------------------------|
| Single 1 –<br>Single 6 | Single 7 –<br>Single 12 | Single 13 –<br>Single 18 | His3;2micron;KanR-ColE1           |

**Supplementary Table 11. Golden Gate Assembly reaction parts for second promoter screen to optimise conversion of ACV to benzylpenicillin**

| Strain | pcbC   | pclA   | penDE  | pcbC promoter Strength | pclA promoter Strength | penDE promoter Strength |
|--------|--------|--------|--------|------------------------|------------------------|-------------------------|
| Sc.P2  | HHF1   | TEF1   | PGK1   | 81                     | 230                    | 291                     |
| S7     | TDH3   | CCW12  | TEF1   | 820                    | 575                    | 230                     |
| S2     | PGK1   | TDH3   | TEF1   | 291                    | 820                    | 230                     |
| S3     | RPL18B | TEF1   | TEF1   | 60                     | 230                    | 230                     |
| S1     | RPL18B | TEF1   | TEF1   | 60                     | 230                    | 230                     |
| S6     | RPL18B | TDH3   | CCW12  | 60                     | 820                    | 575                     |
| S4     | PGK1   | TEF1   | PGK1   | 291                    | 230                    | 291                     |
| S5     | TEF1   | TDH3   | PGK1   | 230                    | 820                    | 291                     |
| S10    | CCW12  | PGK1   | CCW12  | 575                    | 291                    | 575                     |
| S11    | RPL18B | HHF1   | RPL18B | 60                     | 81                     | 60                      |
| S8     | TEF1   | TDH3   | CCW12  | 230                    | 820                    | 575                     |
| S12    | TDH3   | PGK1   | TEF1   | 820                    | 291                    | 230                     |
| S9     | PGK1   | RPL18B | TEF1   | 291                    | 60                     | 230                     |

**Supplementary Table 12. Promoter strengths for strains shown in Figure 3d**
